# Supplementary material for: CNT/turanite/FeNdCo-alloy electrodes to enhance the capacitance of waterproof/eco-friendly supercapacitors
Source: Royal Society of Chemistry journal article supplement (doi:10.1039/d3nj02159a), 2023-01-01
Supplement: d3nj02159a1.pdf [file d3nj02159a1.pdf]

## SUPPORTING INFORMATION

### CNT/turanite/FeNdCo-alloy electrodes to enhance the capacitance of waterproof/eco-friendly supercapacitors

Marco Balderas, Edgar Giovanni Villabona-Leal, Anvar A. Zakhidov, Arturo Isaias.  
Martinez, Pedro Salas, Andrea Molina, Horacio Flores-Zuñiga and Jorge Oliva

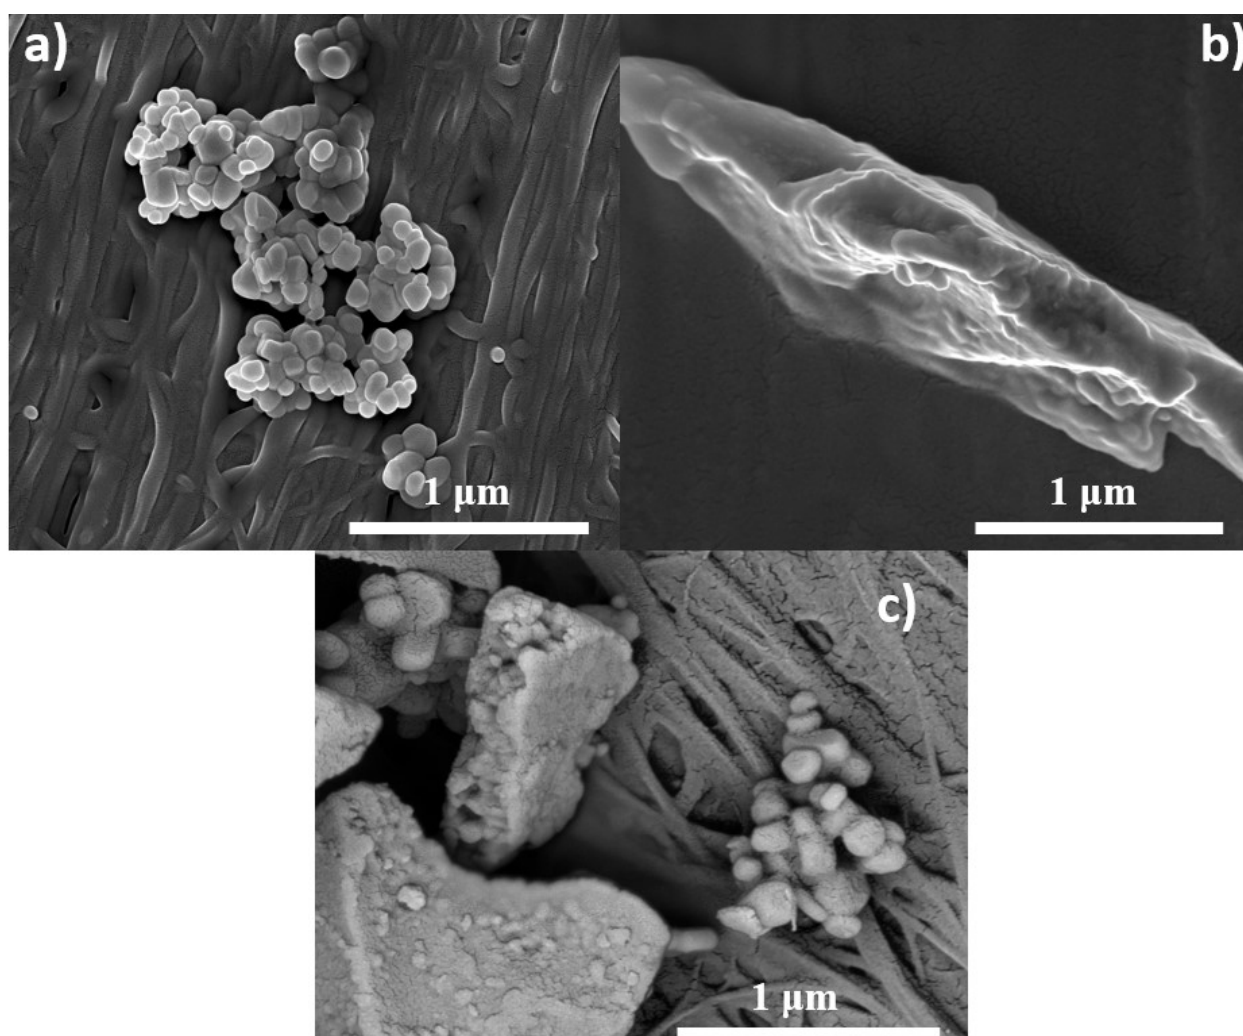

**Fig. S1.** SEM micrographs for: a) CuVO nanoparticles, b) FNC-E electrode, c) CuVO/FNC-E electrode.

**Table S1. Electrochemical parameters of SC devices made with vanadium oxides, Fe and/or Co based metallic alloys.**

| Material used for SC electrode                        | Specific Capacitance (F g <sup>-1</sup> ) | Energy density (Wh Kg <sup>-1</sup> ) | Current density        | Stability            | Type     | Ref. |
|-------------------------------------------------------|-------------------------------------------|---------------------------------------|------------------------|----------------------|----------|------|
| FeCo-alloy@FeCo-sulfide                               | ~201                                      | 72.1                                  | 1 A g <sup>-1</sup>    | 68.9% (10000 cycles) | Flexible | [36] |
| Cu <sub>3</sub> V <sub>2</sub> O <sub>8</sub> @rGO    | 36.68                                     | 7.64                                  | 0.14 A g <sup>-1</sup> | 74% (2000 cycles)    | Rigid    | [49] |
| CuCo <sub>2</sub> V <sub>2</sub> O <sub>8</sub>       | 175.9                                     | 62.54                                 | 2 A g <sup>-1</sup>    | 94% (7000 cycles)    | Rigid    | [50] |
| CuV <sub>2</sub> O <sub>6</sub>                       | 8                                         | 1.6                                   | 0.2 A g <sup>-1</sup>  | 98% (2000 cycles)    | flexible | [51] |
| FeVO <sub>4</sub>                                     | 73                                        | 27                                    | 3 mA cm <sup>-2</sup>  | 100% (1000 cycles)   | Rigid    | [52] |
| Zn <sub>3</sub> V <sub>2</sub> O <sub>8</sub> @MWN CT | 86                                        | 12                                    | 1 A g <sup>-1</sup>    | 81% (5000 cycles)    | Rigid    | [53] |
| CoNi-CNF                                              | 132                                       | 4.60                                  | 1 A g <sup>-1</sup>    | 85.3% (10000 cycles) | Rigid    | [54] |
| CoNi@NCNT                                             | 30.8                                      | 24.7                                  | 0.25 A g <sup>-1</sup> | 94.6 % (5000 cycles) | Rigid    | [55] |
| CNT/CuVO/FNC                                          | 868.3 Fg <sup>-1</sup>                    | 173                                   | 1 A g <sup>-1</sup>    | 97.5% (500 cycles)   | Flexible | This |

|  |  |  |  |         |  |      |
|--|--|--|--|---------|--|------|
|  |  |  |  | cycles) |  | work |
|--|--|--|--|---------|--|------|

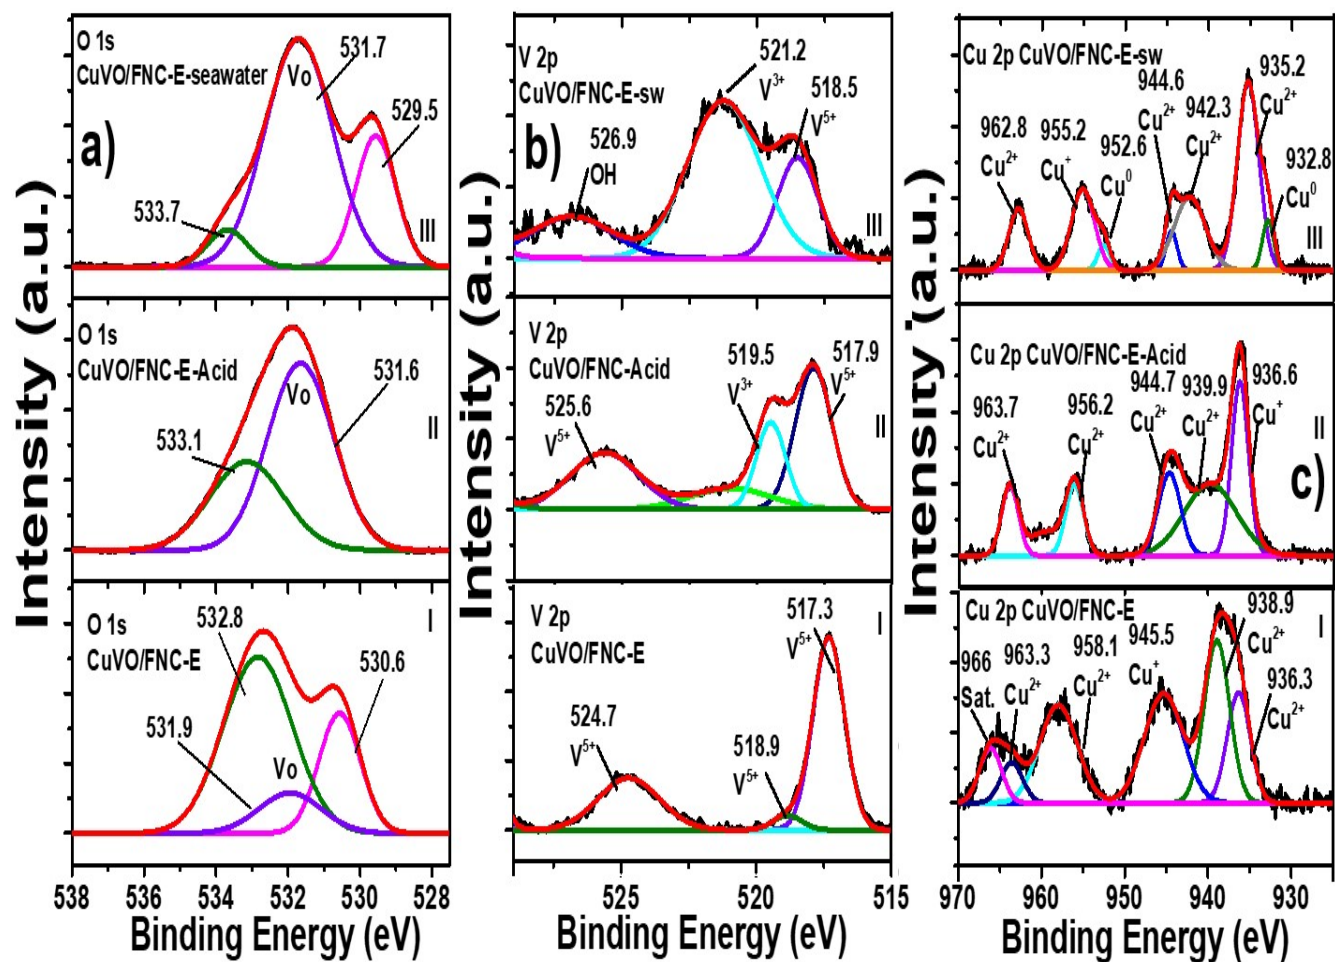

**Fig. S2.** Deconvoluted XPS spectra for the CUVO/FNC-E, CUVO/FNC-E-Acid, and CUVO/FNC-E-sw electrodes: a) O 1s, b) V 2p and c) Cu 2p orbitals.

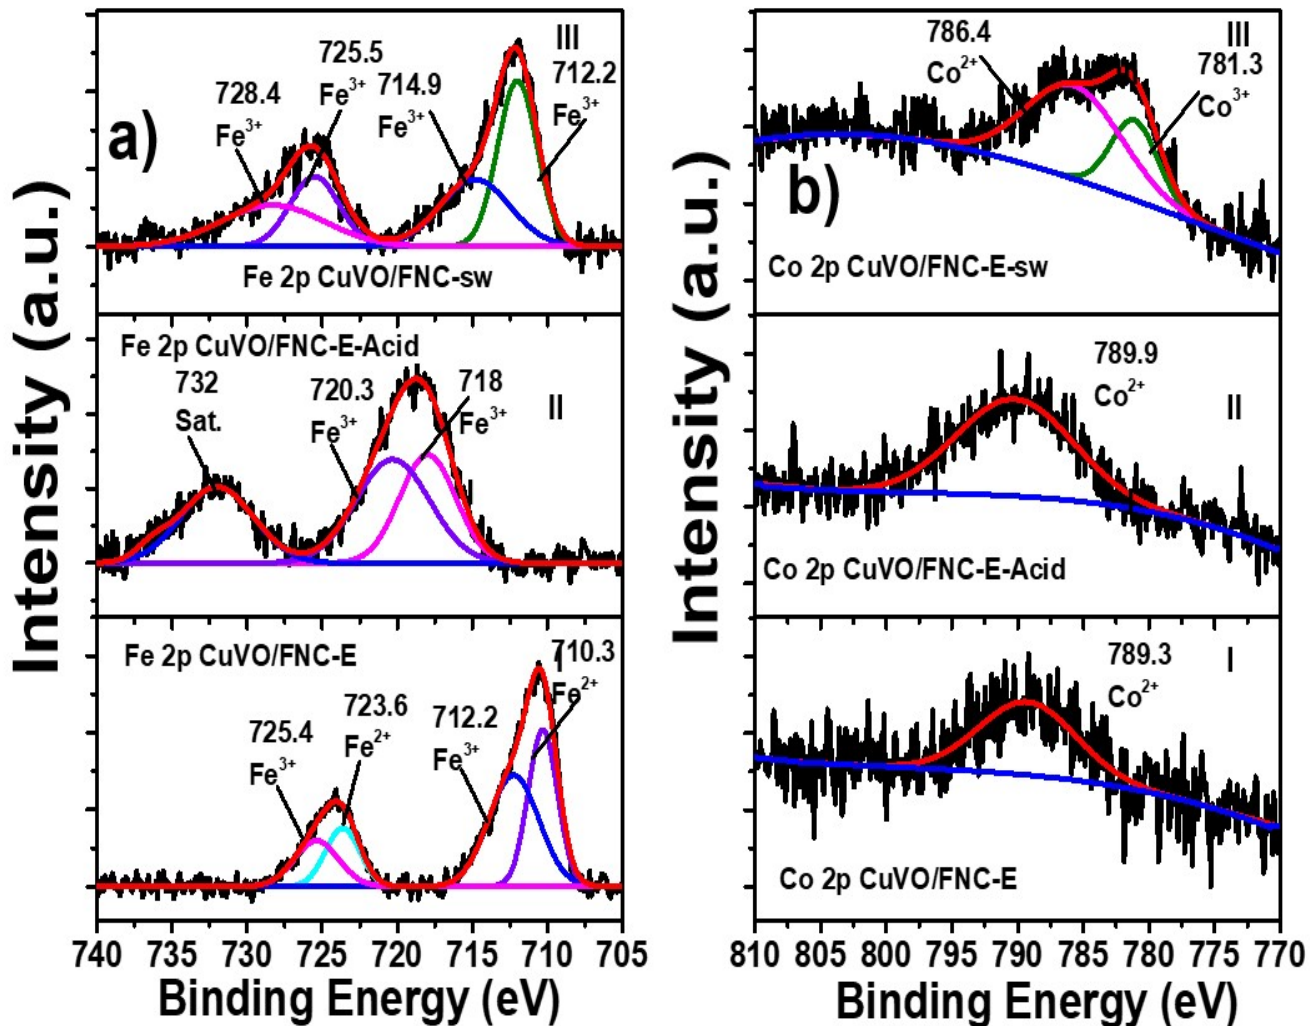

**Fig. S3.** Deconvoluted XPS spectra for the CUVO/FNC-E, CUVO/FNC-E-Acid, and CUVO/FNC-E-sw electrodes: a) Fe 2p and b) Co 2p orbitals.
